# Supplementary material for: Steam treatment: a facile and effective process for the removal of PVP from shape-controlled palladium nanoparticles
Source: Royal Society of Chemistry journal article supplement (doi:10.1039/c8nr02996b), 2018-01-01
Supplement: c8nr02996b1.pdf [file c8nr02996b1.pdf]

## Supporting information

### Steam treatment: a facile and effective process for the removal of PVP from shape-controlled palladium nanoparticles

Lini Yang,<sup>a</sup> Guangzhen Cheng<sup>a, b</sup>, Yushu Guo<sup>a</sup>, Dan Li<sup>a</sup>, Lixin Xia<sup>a\*</sup> and Hongyang Liu<sup>b\*</sup>

<sup>a</sup> Department of Chemistry, Liaoning University, Shenyang, Liaoning, China, 110036

<sup>b</sup> Shenyang National Laboratory for Materials Science, Institute of Metal Research, Chinese Academy of Sciences, Shenyang, Liaoning, China, 110016

\* Corresponding author: [lixinxia@lnu.edu.cn](mailto:lixinxia@lnu.edu.cn); [liuhy@imr.ac.cn](mailto:liuhy@imr.ac.cn)

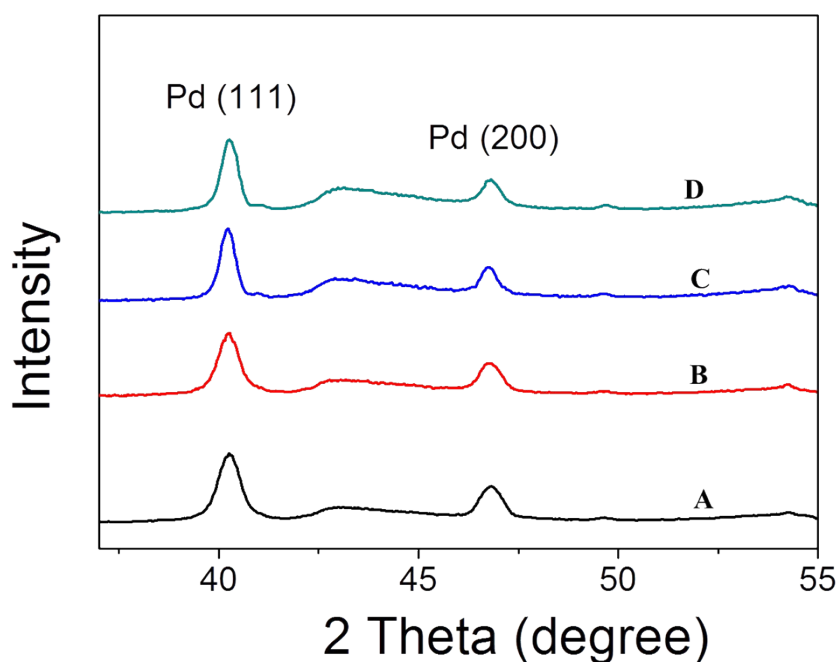

**Figure S1.** XPD patterns of the (A) PVP-Pd-NCs/CNTs, (B) Clean-Pd-NCs/CNTs (treated by steam at 80°C), (C) PVP-Pd-NOs/CNTs, (D) Clean-Pd-NOs/CNTs (treated by steam at 80°C).

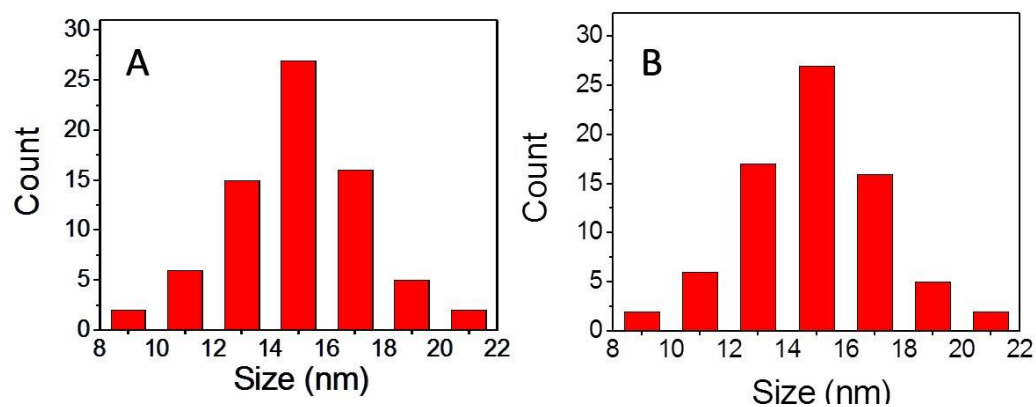

**Figure S2.** Size distribution of Pd NCs in the (A) PVP-Pd-NCs/CNTs, (B) Clean-Pd-NCs/CNTs (treated by steam at 80°C).

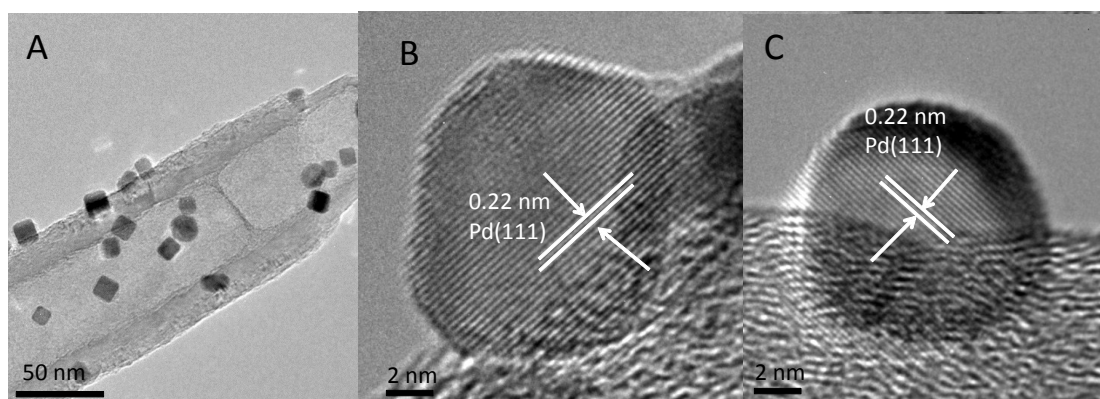

**Figure S3.** TEM (A) and HRTEM (B, C) images of as prepared PVP-Pd-NCs/CNTs after treating by steam at 100 °C.

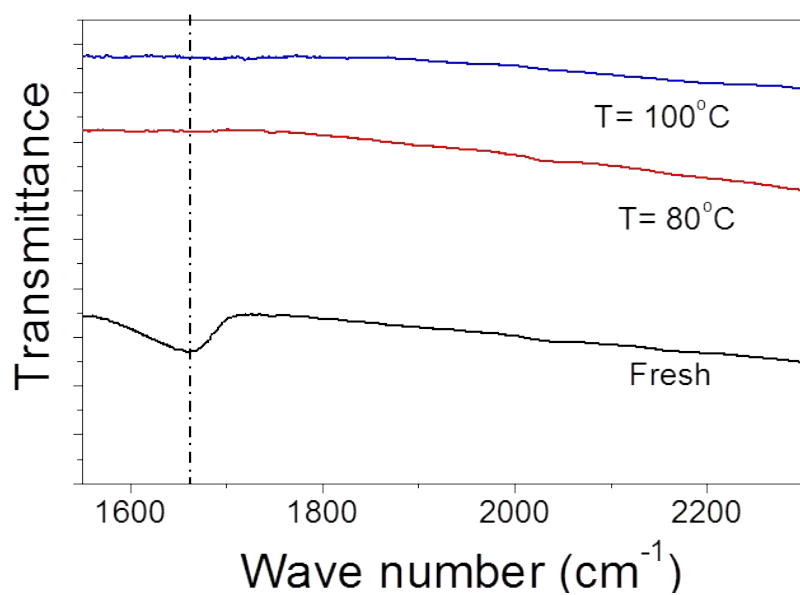

**Figure S4.** IR spectrum of as-prepared PVP-Pd-NCs/CNTs after treating by steam at different temperatures.

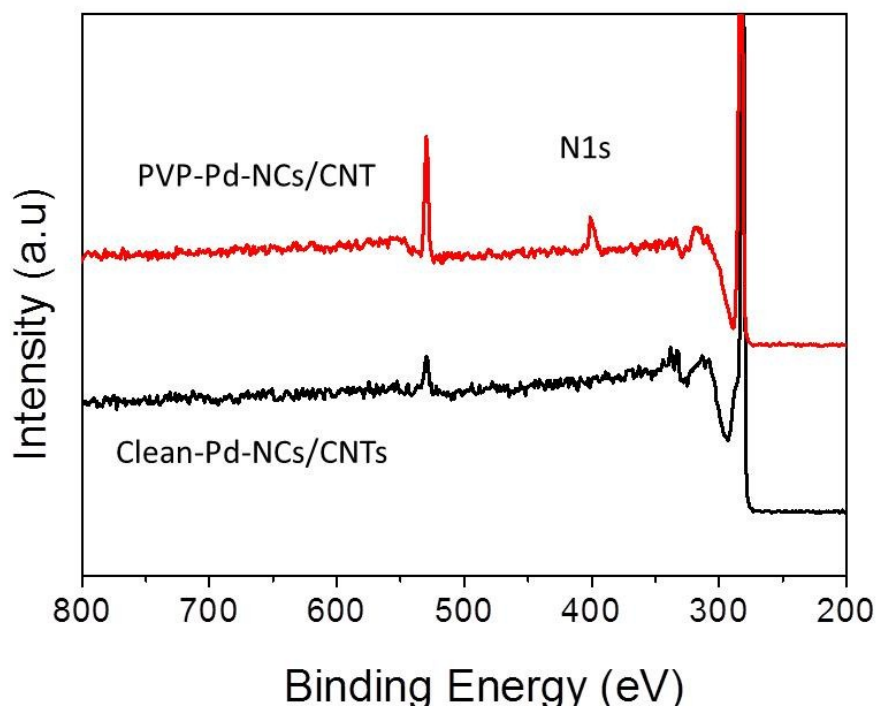

**Figure S5.** XPS survey scans of the as-prepared PVP-Pd-NCs/CNTs and Clean-Pd-NCs/CNTs treated by steam at 80 °C.

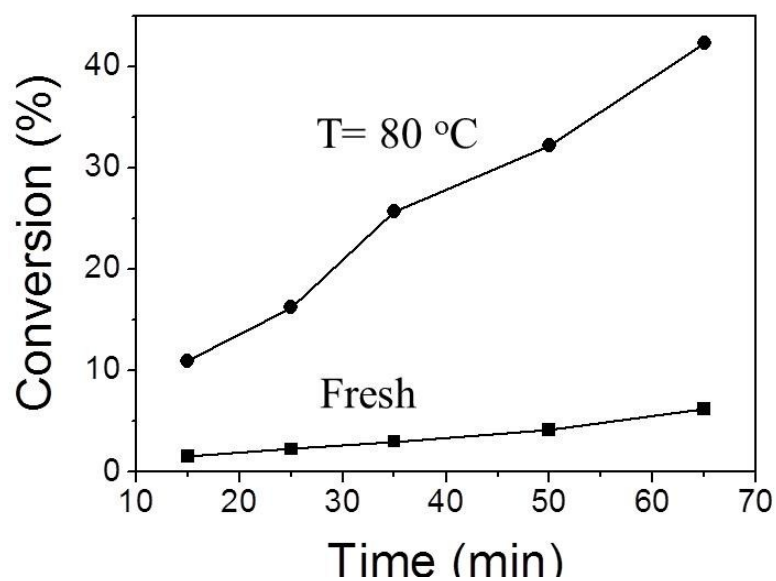

**Figure S6.** Conversion of bromobenzene in Suzuki coupling reaction for the PVP-Pd-NOs/CNTs and Clean-Pd-NOs/CNTs treated by steam at 80 °C. Reaction condition: 50 °C, bromobenzene (4 mmol), phenylboronic acid (4.8 mmol),  $K_2CO_3$  (8 mmol), 25 ml  $C_2H_5OH$  (25ml),  $H_2O$  (15 ml), catalysts (15 mg), Pd weight loading (1 wt%).
